# Supplementary material for: The Histone H3 K4me3, K27me3, and K27ac Genome-Wide Distributions Are Differently Influenced by Sex in Brain Cortexes and Gastrocnemius of the Alzheimer’s Disease PSAPP Mouse Model
Source: Epigenomes. 2021 Nov 25;5(4):26. doi: 10.3390/epigenomes5040026 (PMC8715457; doi:10.3390/epigenomes5040026)
Supplement: Supplementary file 1 [file epigenomes-05-00026-s001.zip › epigenomes-1442647-SI.pdf]

Supplementary Material

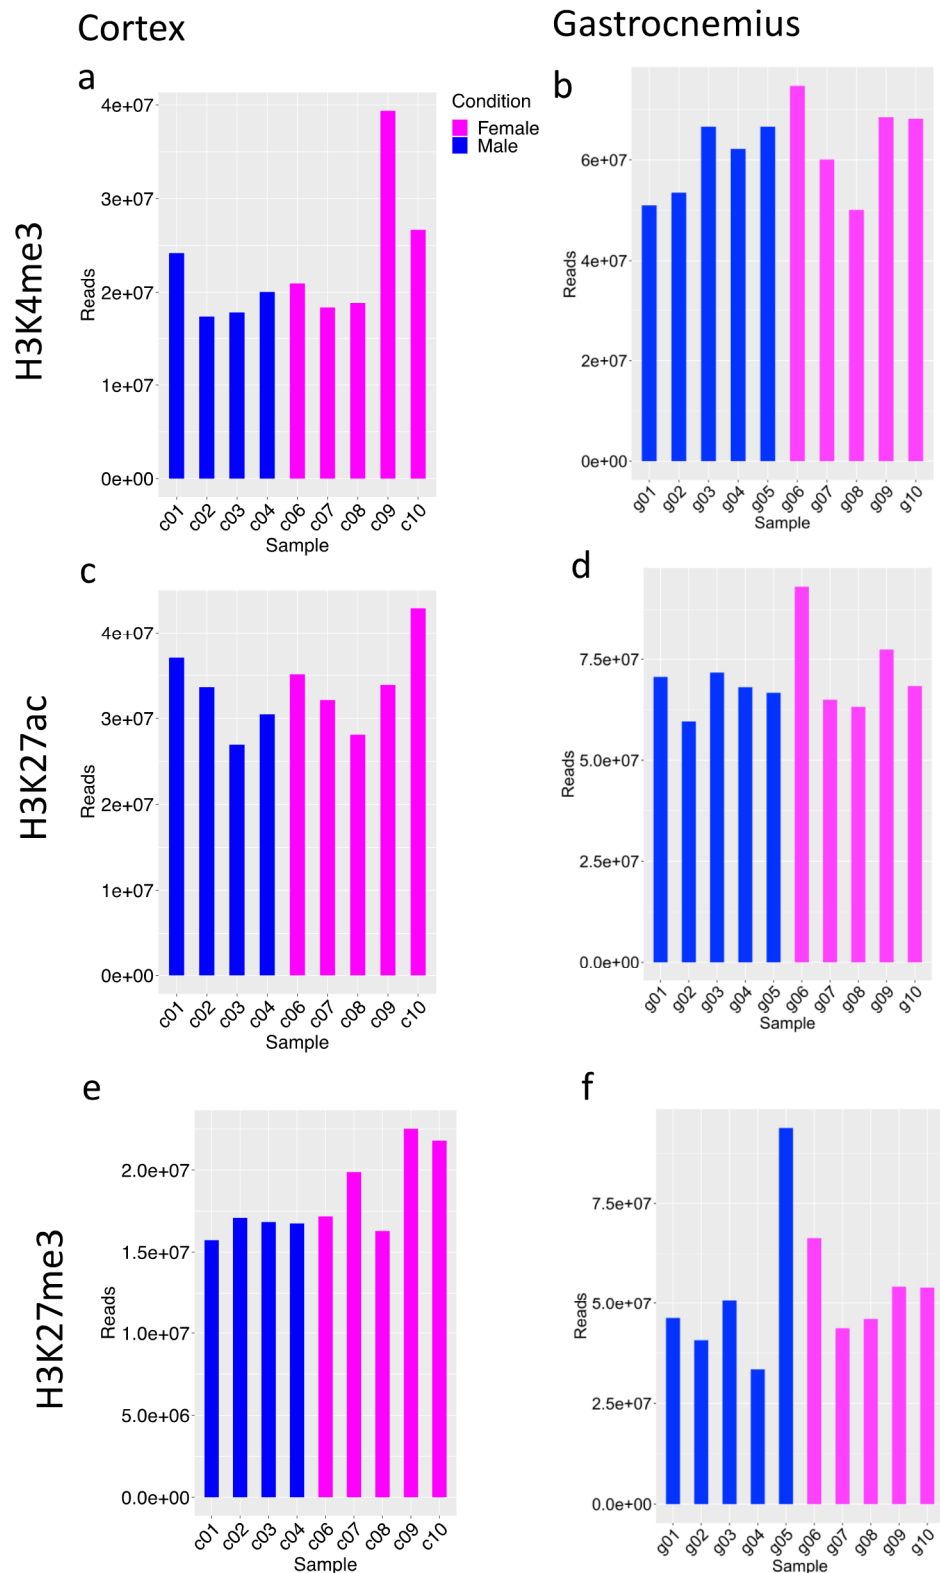

**Figure S1.** Number of aligned reads. On the left side the number of reads for H3K4me3 (a), H3K27ac (c) and H3K27me3 (e) in brain is reported. The right part of the figure shows the aligned reads for gastrocnemius H3K4me3 (b), H3K27ac (d) and H3K27me3 (f). Males are in blue, females in pink.

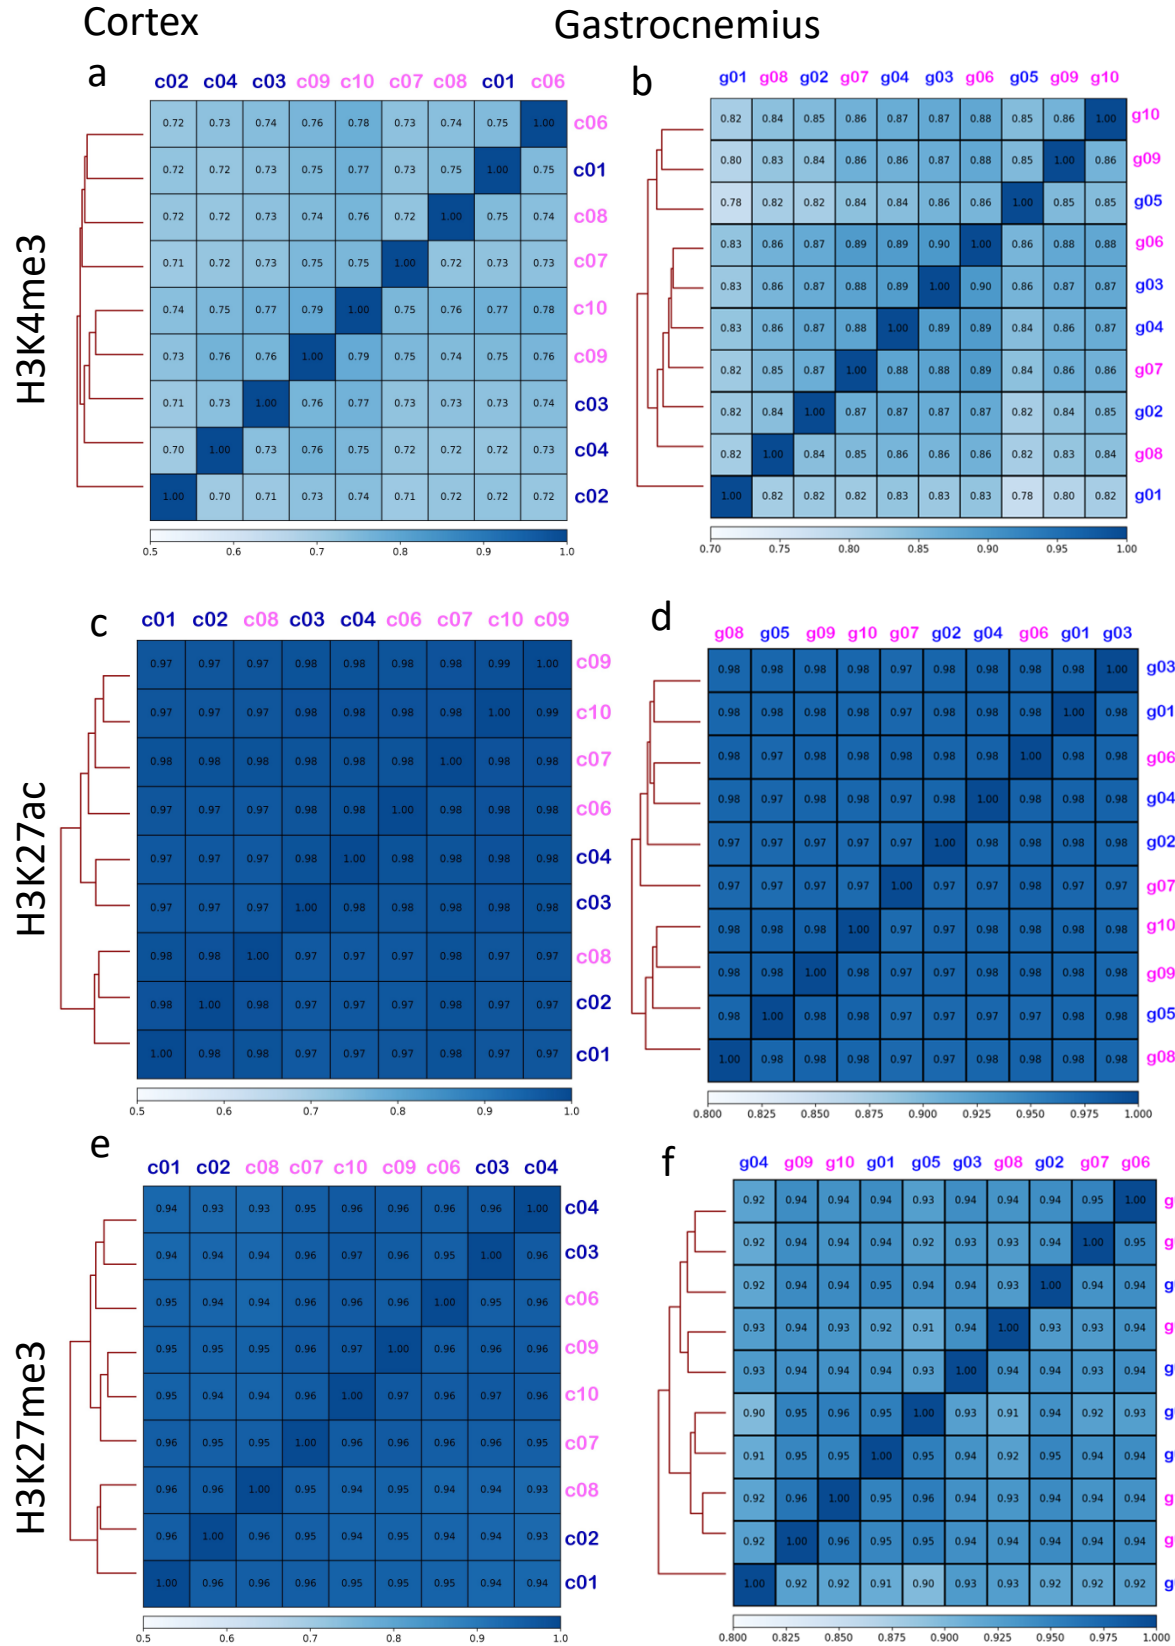

**Figure S2.** Spearman correlation including only autosomes. On the left side the Spearman correlation heatmap is represented including all the aligned autosomal chromosomes for H3K4me3 (a), H3K27ac (c) and H3K27me3 (e) in brain. The corresponding graphs of gastrocnemius H3K4me3 (b), H3K27ac (d) and H3K27me3 (f) are reported on the right part of the panel. Males are in blue, females in pink. The color of each cell represents the Spearman coefficient which ranges from 0.7 to 1 (highest correlation).

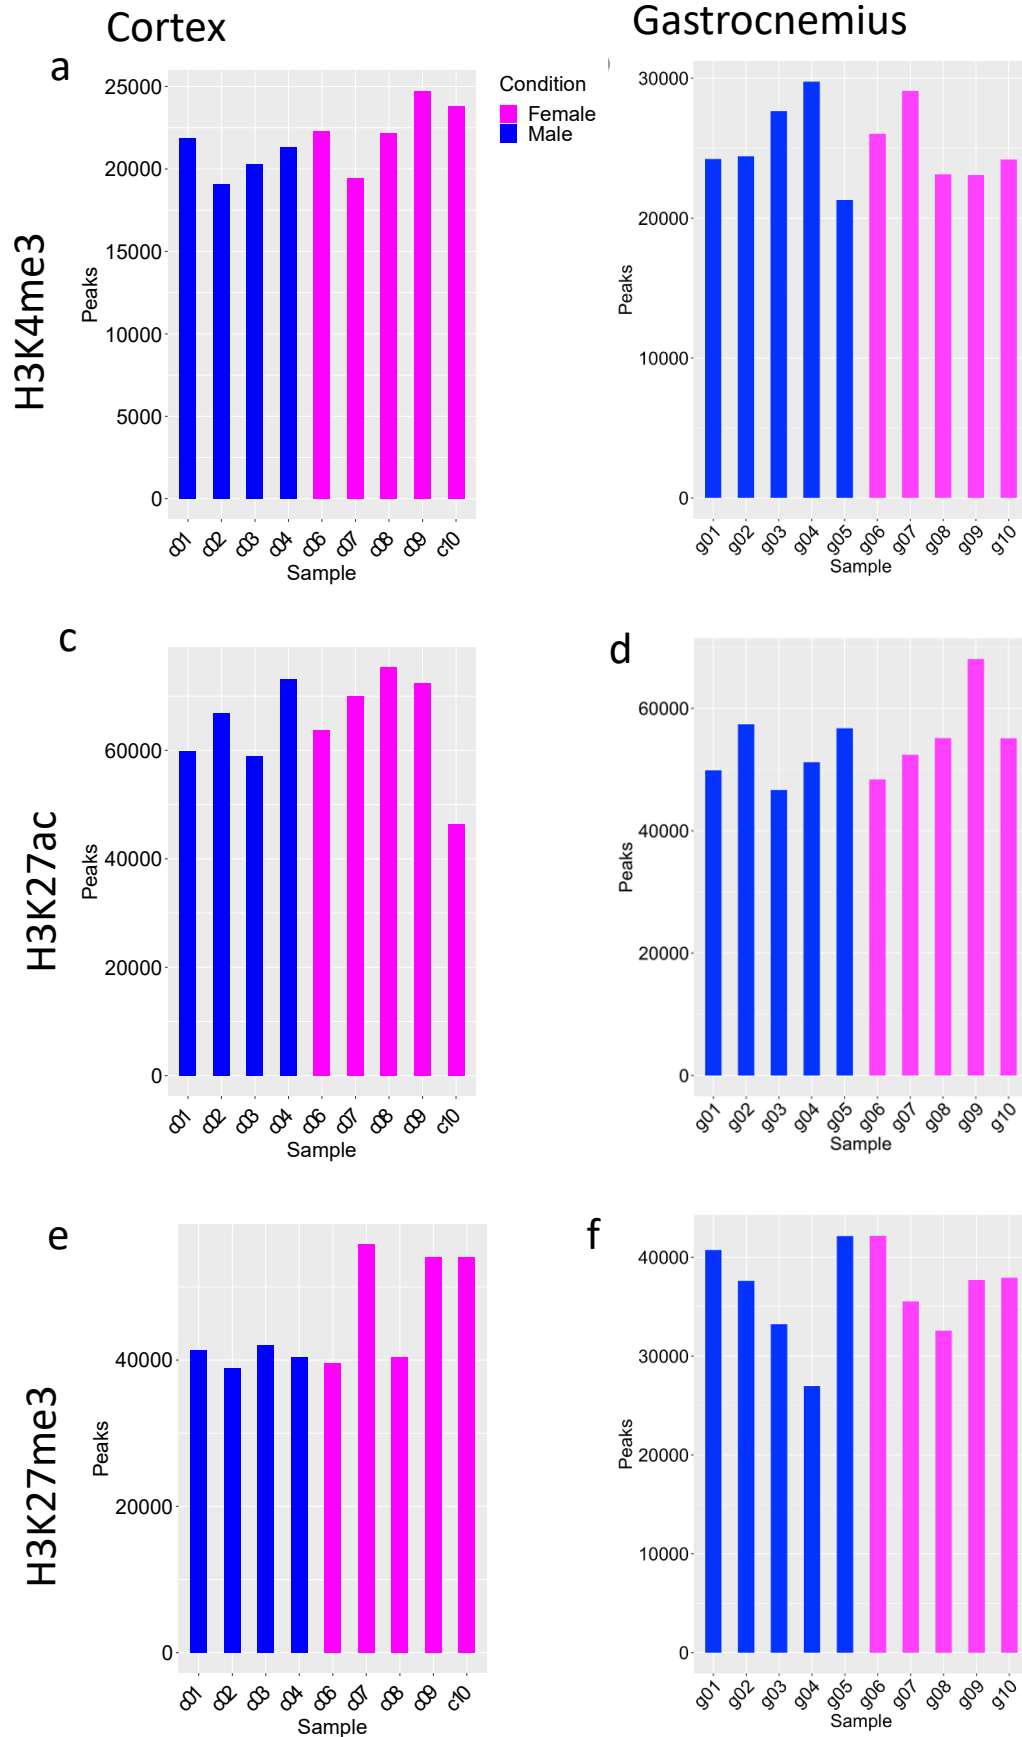

**Figure S3.** Number of peaks. On the left side the number of peaks for H3K4me3 (a), H3K27ac (c) and H3K27me3 (e) in brain is reported. The right part of the figure shows the aligned reads for gastrocnemius H3K4me3 (b), H3K27ac (d) and H3K27me3 (f). Males are in blue, females in pink.

**Table S1.** Number of regions investigated during the differential bounding analyses. The number of regions investigated in each differential analysis is reported. Only peaks present in at least three samples of the considered group (females or males) were taken in consideration.

| Histone modification | Chromosomes  | N° of peaks<br>Cortex | N° of peaks<br>Gastrocnemius |
|----------------------|--------------|-----------------------|------------------------------|
| H3K4me3              | Autosomes    | 20962                 | 22798                        |
|                      | X chromosome | 655                   | 629                          |
| H3K27ac              | Autosomes    | 45236                 | 31242                        |
|                      | X chromosome | 738                   | 719                          |
| H3K27me3             | Autosomes    | 26482                 | 18965                        |
|                      | X chromosome | 4716                  | 1283                         |

**Table S2.** H3K4me3 differentially bound sites and related annotations in cortex. The number of the up and down regulated sites in females with respect to males is reported together with their feature distribution. Only sites with an FDR<0.1 were taken in consideration.

| Chromosomes H3K4me3<br>(Cortex) | Feature           | Up | Down |
|---------------------------------|-------------------|----|------|
| Autosomes                       | Promoters         | 0  | 1    |
|                                 | Gene Body         | 0  | 0    |
|                                 | Distal intergenic | 0  | 1    |
|                                 | Total             | 0  | 2    |
| X chromosome                    | Promoters         | 22 | 8    |
|                                 | Gene Body         | 14 | 2    |
|                                 | Distal intergenic | 18 | 1    |
|                                 | Total             | 54 | 11   |

**Table S3.** H3K4me3 differentially bound sites and related annotations in gastrocnemius. The number of the up and down regulated sites in females with respect to males is reported together with their feature distribution. Only sites with an FDR<0.1 were taken in consideration.

| Chromosomes H3K4me3<br>(Gastrocnemius) | Feature           | Up | Down |
|----------------------------------------|-------------------|----|------|
| Autosomes                              | Promoters         | 25 | 23   |
|                                        | Gene Body         | 15 | 35   |
|                                        | Distal intergenic | 13 | 28   |
|                                        | Total             | 53 | 86   |
| X chromosome                           | Promoters         | 40 | 10   |
|                                        | Gene Body         | 24 | 14   |

|  |                   |    |    |
|--|-------------------|----|----|
|  | Distal intergenic | 22 | 2  |
|  | Total             | 86 | 16 |

**Table S4.** H3K27ac differentially bound sites and related annotations in cortex. The number of the up and down regulated sites in females with respect to males is reported together with their feature distribution. Only sites with an FDR<0.1 were taken in consideration.

| Chromosomes H3K27ac<br>(Cortex) | Feature           | Up | Down |
|---------------------------------|-------------------|----|------|
| Autosomes                       | Promoters         | 0  | 1    |
|                                 | Gene Body         | 0  | 0    |
|                                 | Distal intergenic | 1  | 0    |
|                                 | Total             | 1  | 1    |
| X chromosome                    | Promoters         | 13 | 4    |
|                                 | Gene Body         | 24 | 4    |
|                                 | Distal intergenic | 10 | 1    |
|                                 | Total             | 47 | 9    |

**Table S5.** H3K27ac differentially bound sites and related annotations in gastrocnemius. The number of the up and down regulated sites in females with respect to males is reported together with their feature distribution. Only sites with an FDR<0.1 were taken in consideration.

| Chromosomes H3K27ac<br>(Gastrocnemius) | Feature           | Up  | Down |
|----------------------------------------|-------------------|-----|------|
| Autosomes                              | Promoters         | 87  | 36   |
|                                        | Gene Body         | 170 | 157  |
|                                        | Distal intergenic | 217 | 114  |
|                                        | Total             | 474 | 307  |
| X chromosome                           | Promoters         | 13  | 4    |
|                                        | Gene Body         | 22  | 9    |
|                                        | Distal intergenic | 14  | 7    |
|                                        | Total             | 49  | 20   |

**Table S6.** H3K27me3 differentially bound sites and related annotations in cortex. The number of the up and down regulated sites in females with respect to males is reported together with their feature distribution. Only sites with an FDR<0.1 were taken in consideration.

| <b>Chromosomes H3K27me3<br/>(Cortex)</b> | <b>Feature</b>    | <b>Up</b> | <b>Down</b> |
|------------------------------------------|-------------------|-----------|-------------|
| Autosomes                                | Promoters         | 0         | 0           |
|                                          | Gene Body         | 1         | 1           |
|                                          | Distal intergenic | 3         | 0           |
|                                          | Total             | 1         | 1           |
| X chromosome                             | Promoters         | 41        | 7           |
|                                          | Gene Body         | 61        | 10          |
|                                          | Distal intergenic | 72        | 15          |
|                                          | Total             | 174       | 32          |

**Table S7.** H3K27me3 differentially bound sites and related annotations in gastrocnemius. The number of the up and down regulated sites in females with respect to males is reported together with their feature distribution. Only sites with an FDR<0.1 were taken in consideration.

| <b>Chromosomes H3K27me3<br/>(Gastrocnemius)</b> | <b>Feature</b>    | <b>Up</b> | <b>Down</b> |
|-------------------------------------------------|-------------------|-----------|-------------|
| Autosomes                                       | Promoters         | 41        | 7           |
|                                                 | Gene Body         | 61        | 10          |
|                                                 | Distal intergenic | 72        | 15          |
|                                                 | Total             | 174       | 32          |
| X chromosome                                    | Promoters         | 95        | 152         |
|                                                 | Gene Body         | 164       | 69          |
|                                                 | Distal intergenic | 155       | 69          |
|                                                 | Total             | 414       | 220         |

**Table S8.** Biological signatures associated to H3K4me3-regulated promoters on cortex X chromosome. Ingenuity pathway analysis for promoters found to be differentially bound by H3K4me3 on brain X chromosome was carried out and results are reported here. Only terms with an activation z-score above |2| are taken in consideration. All the results are presented as regulated (increased/decreased) in females with respect to males.

| Cortex Diseases or Functions (H3K4me3 X) | p-value  | Predicted Activation State | Activation z-score | Molecules                                                                                                                                           | N° of molecules |
|------------------------------------------|----------|----------------------------|--------------------|-----------------------------------------------------------------------------------------------------------------------------------------------------|-----------------|
| Frequency of tumor                       | 1.74E-03 | Decreased                  | -2.000             | P1S2,CA5B,CDX4,DDX3X,DUSP9,EIF2S3,GPR34,HCCS, HUWE1,Jpx,KCND1,KDM5C,KDM6A,L1CAM,MAOB, MID1,PBDC1,PHKA2, RENBP,SLC38A5,TAB3,TLR7, UTP14A,XIST        | 24              |
| Incidence of tumor                       | 2.71E-03 | Decreased                  | -2.000             | AP1S2,CA5B,CDX4,DDX3X,DUSP9,EIF2S3,GPR34,HCCS, HUWE1,Jpx,KCND1,KDM5C,KDM6A,L1CAM,MAOB, MID1,PBDC1,PHKA2,RENB,SLC38A5,TAB3,TLR7, UTP14A, XIST        | 24              |
| Formation of solid tumor                 | 7.12E-03 | Decreased                  | -2.000             | AP1S2,CA5B,CDX4,DDX3X,DUSP9,EIF2S3,GPR34,HCCS, HUWE1,Jpx,KCND1,KDM5C,KDM6A,L1CAM,MAOB, MID1, PBDC1,PHKA2,RENB,SLC38A5,TAB3,TLR7, UTP14A,XIST, ZFP92 | 25              |

**Table S9.** Biological signatures associated to H3K4me3-regulated promoters on gastrocnemius X chromosome. Ingenuity pathway analysis for promoters found to be differentially bound by H3K4me3 on gastrocnemius X chromosome was carried out and results are reported here. Only terms with an activation z-score above |2| are taken in consideration. All the results are presented as regulated (increased/decreased) in females with respect to males.

| Gastrocnemius Diseases or Functions (H3K4me3 X) | p-value  | Predicted Activation State | Activation z-score | Molecules                                                                                                                                                                                                                          | N° of molecules |
|-------------------------------------------------|----------|----------------------------|--------------------|------------------------------------------------------------------------------------------------------------------------------------------------------------------------------------------------------------------------------------|-----------------|
| Development of digestive organ tumor            | 1.36E-05 | Decreased                  | -2.000             | ABCD1,ARHGAP36,CACNA1F,CXorf38,DACH2,DCAF12L2, DDX3X,DUSP9,EIF2S3,GABRQ, GPR143,GPR50, HCCS,IGSF1, Jpx,KCND1, KDM5C,KDM6A,MAGEE2, MAGIX,MAOB,MID1, NAP1L3,PCDH11X,POU3F4, PTCHD1,SLITRK4, SOWAHD, SRPX,UTP14A,XIST                 | 31              |
| Development of carcinoma                        | 4.00E-04 | Decreased                  | -2.000             | ABCD1,ARHGAP36,CACNA1F,CLCN5,CXorf38, DACH2,DCAF12L2,DDX3X,DUSP9,EIF2S3, GABRQ, GPR143,GPR50,HCCS,IGSF1,Jpx,KCND1, KDM5C, KDM6A,MAGEE2,MAGIX,MAOB,MID1,NAP1L3, PBDC1,PCDH11X,POU3F4,PTCHD1, RAB9B,SLITRK4, SOWAHD,SRPX,UTP14A,XIST | 34              |

**Table S10.** Biological signatures associated to H3K27ac-regulated promoters on gastrocnemius autosomes. Ingenuity pathway analysis for promoters found to be differentially bound by H3K27ac on gastrocnemius autosomal chromosomes was carried out and results are reported here. Only terms with an activation z-score above |2| are taken in consideration. All the results are presented as regulated (increased/decreased) in females with respect to males.

| Gastrocnemius Diseases or Functions (H3K27ac autosomes) | p-value  | Predicted Activation State | Activation z-score | Molecules                                                                                                                                                                          | N° of molecules |
|---------------------------------------------------------|----------|----------------------------|--------------------|------------------------------------------------------------------------------------------------------------------------------------------------------------------------------------|-----------------|
| Rheumatic Disease                                       | 1.71E-04 | Increased                  | 2.117              | ALOX5AP,BDNF,FGFR3,GFI1,HNMT,IFI44L,IL15,IRS1, LRTM1,Masp1,mir-1,PGR,PRUNE2,PTPN1,SLC7A2, SYNE1, TMEM178A,TMEM266,TNFRSF11A,VTCN1                                                  | 20              |
| Inflammation of joint                                   | 3.73E-04 | Increased                  | 2.117              | ALOX5AP,BDNF,FGFR3,HNMT,IL15,IRS1,Masp1,PGR, PRUNE2,PTPN1,SLC7A2,SYNE1,TMEM178A, TMEM266, TNFRSF11A,VTCN1                                                                          | 16              |
| Proliferation of epithelial cells                       | 1.18E-03 | Increased                  | 2.396              | BDNF,FGFR3,IL15,INHA,mir-204,PGR,PTPN1, SEMA3C,TNFRSF11A,TRIM24                                                                                                                    | 10              |
| Growth of epithelial tissue                             | 1.52E-03 | Increased                  | 2.683              | ANGPT1,BDNF,FGFR3,IL15,INHA,ITGA4,mir-204,PGR, PTPN1,SEMA3C,TNFRSF11A,TRIM24                                                                                                       | 12              |
| Apoptosis                                               | 2.97E-03 | Decreased                  | -2.096             | ACTC1,ANGPT1,BDNF,BMP8A,CA3,CES1,FGFR3,GFI1, IL15, INHA,IRS1,ITGA4,mir-1,mir-204,MUSK,MYCN, PGR,PKNOX2, PRDM9,PTPN1,RNF13,SEMA3C,SOCS2, SUB1,SYNE1, TNFRSF11A,TRIM24,TSC22D1,VTCN1 | 29              |

**Table S11.** Biological signatures associated to H3K27ac-regulated promoters on gastrocnemius X chromosome. Ingenuity pathway analysis for promoters found to be differentially bound by H3K27ac on brain X chromosome was carried out and results are reported here. Only terms with an activation z-score above |2| are taken in consideration. All the results are presented as regulated (increased/decreased) in females with respect to males.

| Gastrocnemius Diseases or Functions (H3K27ac X) | p-value  | Predicted Activation State | Activation z-score | Molecules                                                             | N° of molecules |
|-------------------------------------------------|----------|----------------------------|--------------------|-----------------------------------------------------------------------|-----------------|
| Frequency of tumor                              | 2.92E-02 | Decreased                  | -2.000             | DDX3X,EIF2S3,GPR34,HCCS,Jpx,KDM5C,KDM6A, MID1,PBDC1,PLS3,UTP14A,XIST  | 12              |
| Incidence of tumor                              | 3.66E-02 | Decreased                  | -2.000             | DDX3X,EIF2S3,GPR34,HCCS,Jpx,KDM5C,KDM6A, MID1, PBDC1,PLS3,UTP14A,XIST | 12              |

Table S12. Diet composition.

| <b>Ingredients</b>            | <b>g/kg diet</b> |
|-------------------------------|------------------|
| <b>Protein, of which</b>      | <b>112.5</b>     |
| casein                        | 111              |
| DL-methionine                 | 1.5              |
| <b>Carbohydrate, of which</b> | <b>722</b>       |
| corn starch                   | 490              |
| maltodextrin                  | 132              |
| sucrose                       | 100              |
| <b>Fat, of which</b>          | <b>70</b>        |
| soybean oil                   | 70               |
| <b>Other Additives</b>        | <b>95.414</b>    |
| cellulose                     | 48               |
| Tert-butylhydroquinone        | 0.014            |
| mineral mix (TD94046)         | 35               |
| vitamin mix (CA40060)         | 10               |
| potassium phosphate monobasic | 2.4              |
